# Supplementary material for: Role of Zn2+ in Protein Structuralization
Source: Research Square preprint supplement (doi:10.21203/rs.3.rs-8064140/v1), 2026-01-05
Supplement: Supplementary file 1 [file 82e0eb97b4ae644e9c8eca9d.docx]

**SUPPLEMENTARY MATERIALS**

**ROLE OF Zn2+ IN PROTEIN STRUCTURALIZATION**

**Irena Roterman, Katarzyna Stapor, Dawid Dułak, Leszek Konieczny**

| **PDB-ID** | **FRAGMENT** | **RD** | **K** |
| --- | --- | --- | --- |
| 2AB3 |  | 0.430 | 0.2 |
| 2AB7 |  | 0.391 | 0.0 |
| 1U86 |  | 0.449 | 0.2 |
| 1A1L | 103-132  133-159  160-185 | 0.593  0.355  0.358  0.445 | 0.8  0.1  0.1  0.1 |
| **1A1F** | 103-132  133-159  160-186 | **0.770**  0.311  0.352  0.450 | **2.1**  0.1  0.1  0.1 |
| **1TF6** | 10-39  40-68  69-102  103-132  133-161  162-188 | **0.805**  0.286  0.380  0.336  0.294  0.474  0.402 | **2.2**  0.0  0.0  0.1  0.0  0.2  0.1 |
| **2DRP** | 103-136  137-164 | 0.734  0.348  0.515 | 1.8  0.0  0.3 |
| **5K5L** | 436-462  463-491 | 0.563  0.391  0.487 | 0.6  0.1  0.3 |
| **1MEY-C/F** | 2-30  31-57  58-84 | 0.756/0.745  0.422/0.412  0.443/0.459  0.374/0.378 | 2.3  0.1/0.1  0.2/0.2  0.0/0.0 |
| **1ZAA** | 3-32  33-60  61-87 | 0.374  0.347  0.429 | 0.1  0.1  0.0 |
| **1P47** | 103-132  133-159  160-185 | 0.707  0.331  0.377  0.473 | 1.8  0.1  0.1  0.2 |
| **1TF3** |  | 0.701  0.314  0.366  0.348 | 1.2  0.0  0.1  0.0 |
| **5EH2-F** | 718-743  744-772  773-798  799-826 | 0.712  0.387  0.361  0.289  0.309 | 2.0  0.0  0.0  0.0  0.0 |
| **6JNM-A/B** | 1265-1292  1293-1323  1324-1352 | 0.706/0.697  0.322/0.306  0.361/0.419  0.310/0.304 | 1.4/1.3  0.0/0.0  0.1/0.0  0.0/0.0 |
| **6WMI-A** | 218-247  248-275  276-307  308-336  337-362 | 0.692  0.398  0.370  0.406  0.465  0.474 | 1.7  0.1  0.1  0.0  0.2  0.2 |
| **7Y3K-A** | 868-895  896-921 | 0.683  0.401  0.397 | 1.0  0.1  0.1 |
| **6E93** | 1009-1035  1036-1063  1064-1092  1093-1120 | 0.718  0.416  0.520  0.385  0.514 | 1.6  0.2  0.4  0.1  0.3 |
| **5V3J-F** | 362-390  391-416  417-444  445-471  472-501  502-527  528-555  556-584  585-612  613-639 | 0.766  0.393  0.365  0.422  0.335  0.377  0.428  0.382  0.442  0.438  0.490 | 2.1  0.0  0.0  0.2  0.1  0.1  0.2  0.1  0.2  0.2  0.3 |
| **1HSO-A** | 1-178,318-375 | 0.567  0.487 | 0.6  0.4 |
| **1I3Q-C** | 43-168 | 0.588  0.414 | 0.6  0.2 |
| **1CYQ-A** | 2-146  115-143 | 0.720  0.652  0.406 | 0.9  0.8  0.1 |
| **1A5T-A**  **enzym** | 1-167 | 0.701  0.553 | 1.4  0.6 |
| **1IA9-A** | 1723-1828 | 0.651  0.476 | 0.6  0.3 |
| **1LDJ-B** |  | 0.412 | 0.2 |
| **1CW0-A** | 2-20  21-156 | 0.520  0.434  0.503 | 0.5  0.2  0.4 |
| **5K5L-E/F/G** | 408-435  436-462  463-491 | 0.563/0.564/0.690  -/-/0.391  0.305/0.305/0.258  0.321/0.328/0.362 | 0.6/0.6/1.1  -/-/0.1  0.0/0.1/0.0  0.0/0.0/0.0 |

Tab. S1. Characteristics of proteins discussed in [33]. The RD and K values are given for complete chains and pseudo-domains (fragments of chains given in the table) distinguished in construction of discussed poroteins. For many chains proteins, the status of all of tchem is given.
