# Supplementary material for: Role of Zn2+ in Protein Structuralization
Source: Research Square preprint supplement (doi:10.21203/rs.3.rs-8064140/v1), 2026-01-05
Supplement: Supplementary file 2 [file c0629dd2619466ccdb9f13af.docx]

**SUPPLEMTARY MATERIALS – 2 – the procedure to calculate the RD and K parameters using the publicly available service: hphob.sano.science**

**ROLE OF Zn2+ IN PROTEIN STRUCTURALIZATION**

**Irena Roterman, Katarzyna Stapor, Dawid Dułak, Leszek Konieczny**

PROCEDURE TO CALCULATE THE RD AND K PARAMETERS AS DEFINED IN **FOD-M** MODEL (FUZZY OIL DROP MODEL)

1. The service is publicly available: hphob.sano.science
2. The screen appearing is as follows


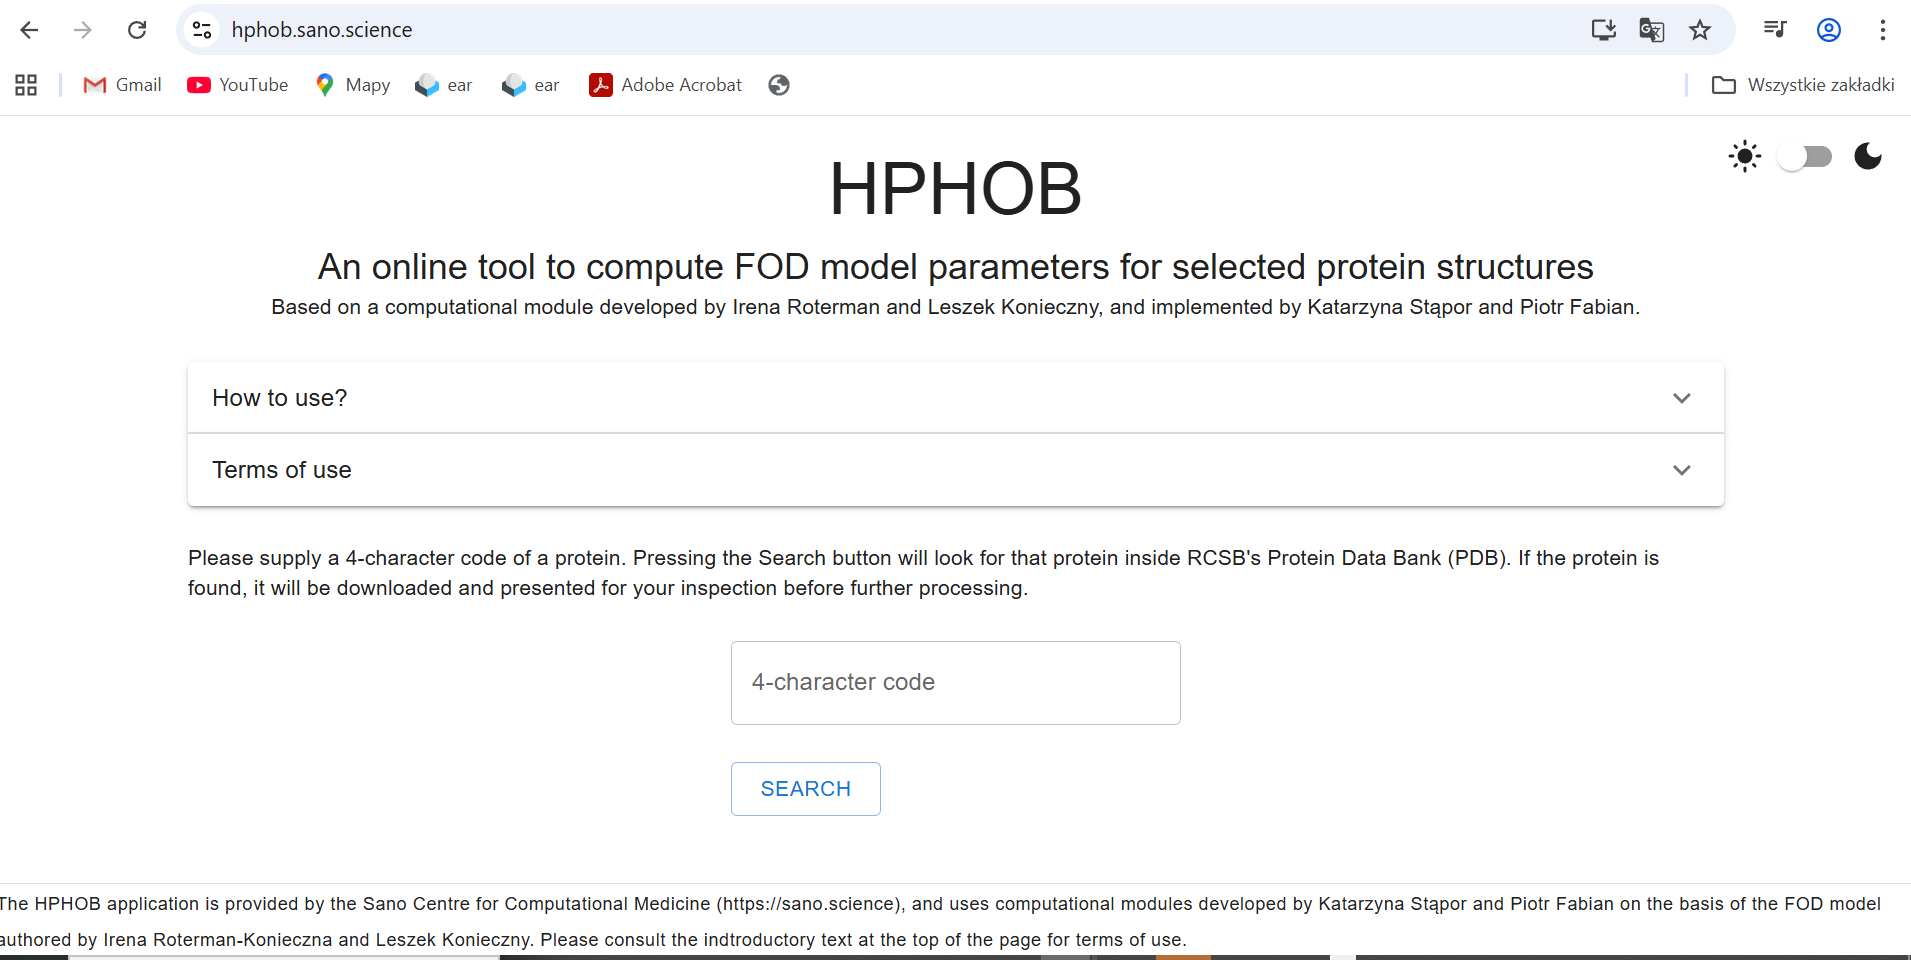


1. The instruction of usage is given in the position How to use it ?
2. The option: Terms of use introduces the potential user with the theoretical background of the FOD-M model
3. The window : 4 character code – put here the PDB code of selected protein
4. After introducing the PDB code and pushing the SEARCH option the dialog window is as follows after selecting the protein with 1LZ1 PDB code:
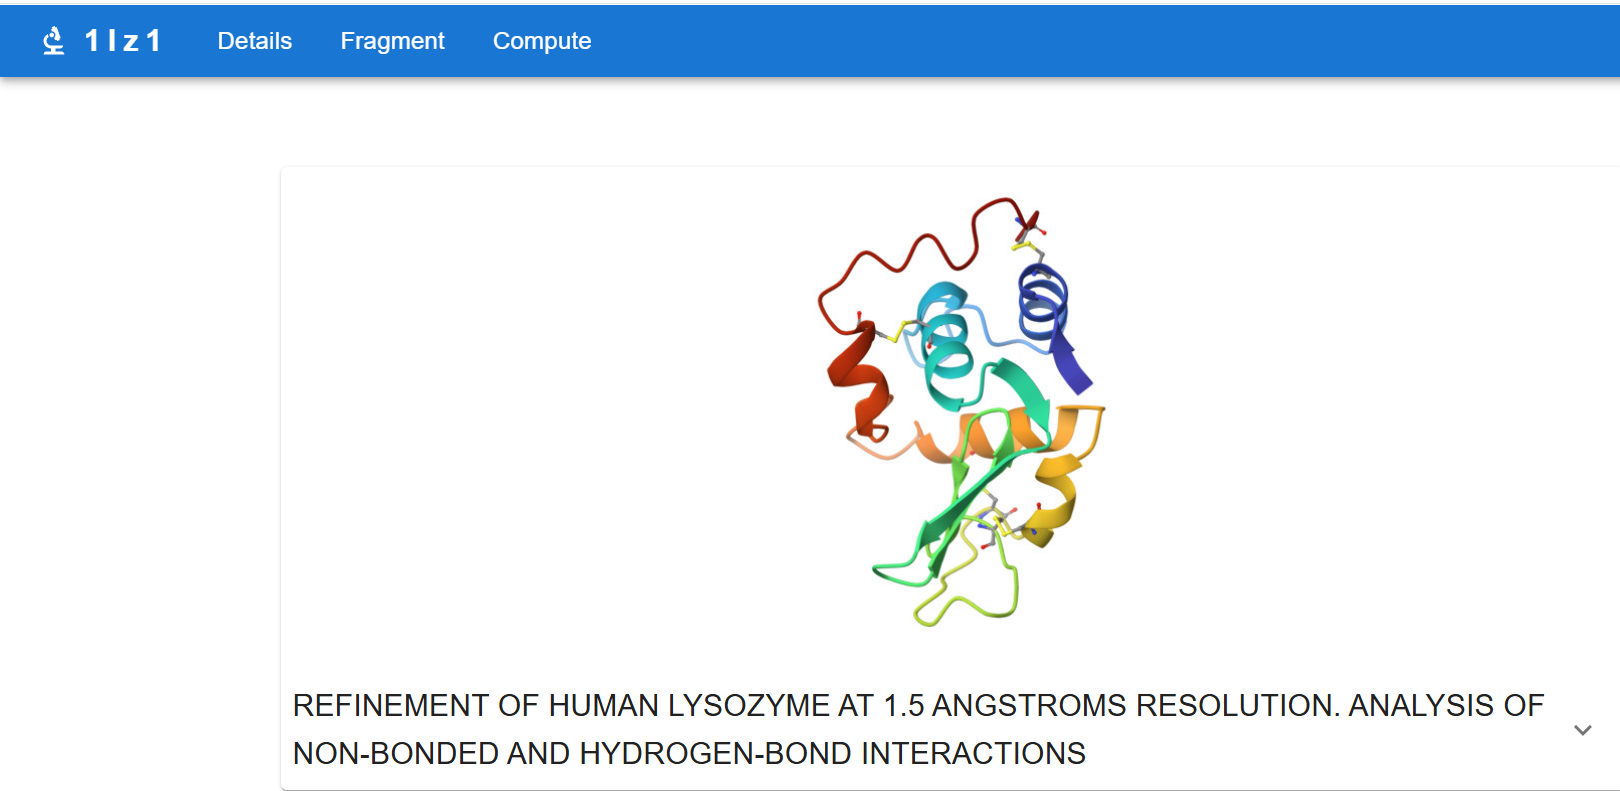

5. After selection „COMPUTE” the short version of results appears as it is shown below


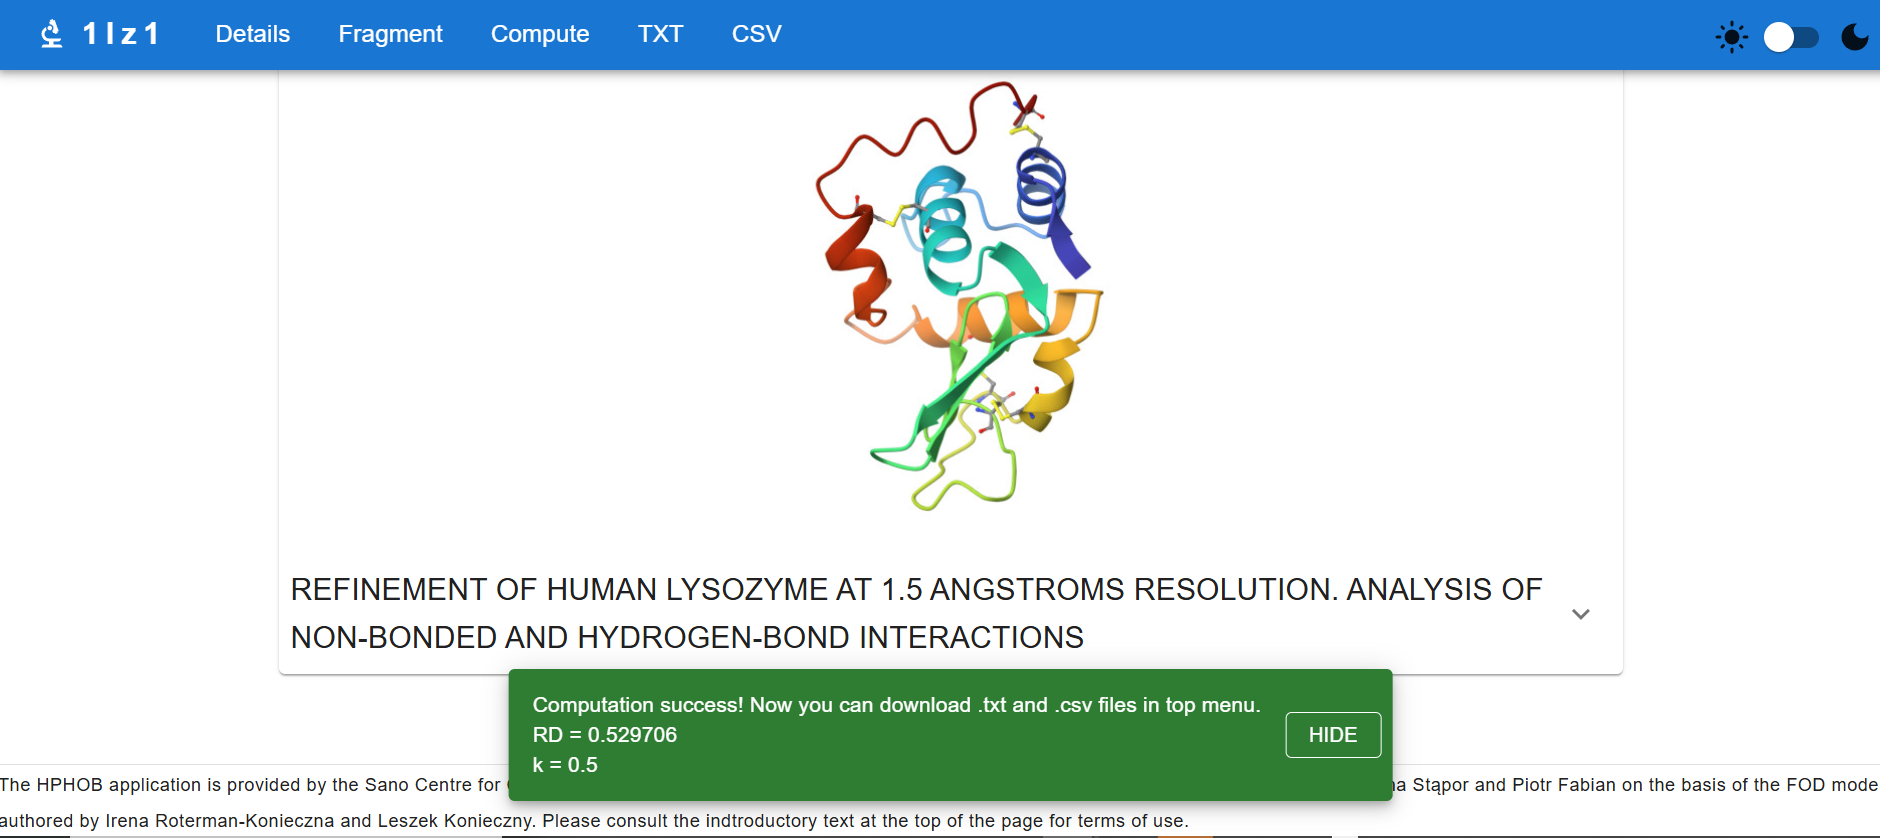


1. The detailed results are available after selection of TXT
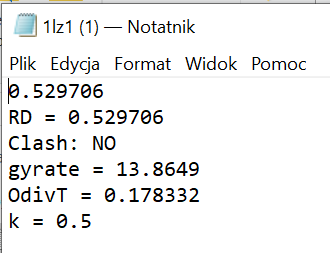


RD value as well K value are given in the file of .txt format – the opening of which gives the results as shown above.

1. Selection of CSV option makes available the results in . csv format.
2. The columns in this file as follows:

Column A – numer of residue according the numbering system as applied in PDB file

B – sequence – 3 letter codes

C – chain identification as appeared in PDB file

D – hydrophobicity scale applied

E – T values calculated according to 3D Gauss function

F – O values calculated according to Micehal Levitt function

G – values of Kullback-Leibler entropy for O|T relations

H – valued of Kullback-Leibler entropy for O|R relations

I, J, K – x, y, z positions for effective atoms

L, M, N – steps for M profile calculation

O – M distribution

1. To draw the set of profiles columns A, E, F and O selected separately allows the graphic presentation of results in form of T, O and M profiles as shown below:


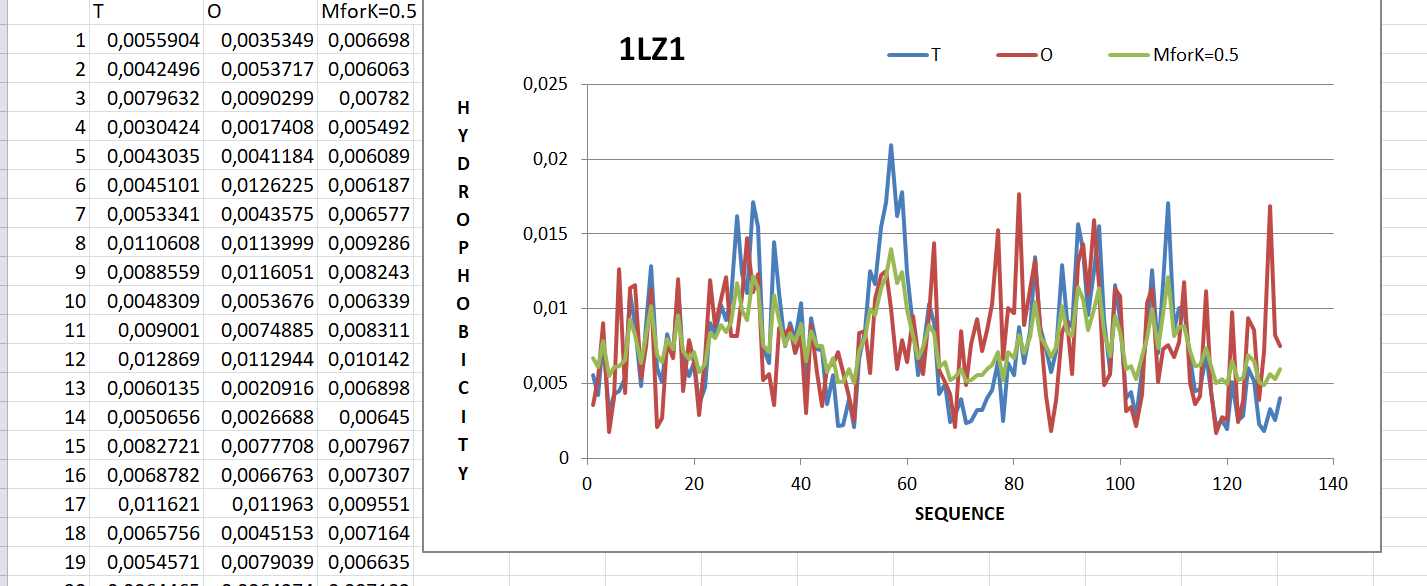


1. The option FRAGMENT allows extraction of the part under condireation like : chain, domain of selected secondary fragment (PDB – 1A6P – two chains protein):


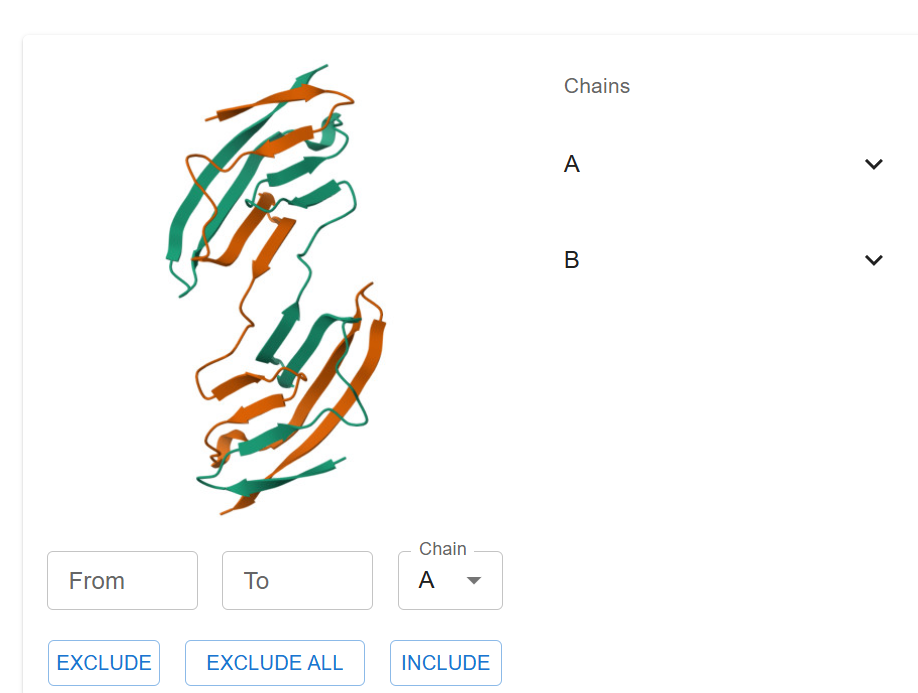


1. To select chain A : click EXCLUDE ALL, than click INCLUDE and the chain in the window above will be treated for calculation after clicking on selected chain on the list on right.
2. Selection of defined chain fragment – clicking on slected chain the list of fragments with defined secondary structure gets opened. Clicking on selected fragments makes tchem included in calculation. Only sheet fragment 5-9 got selected in the example below.


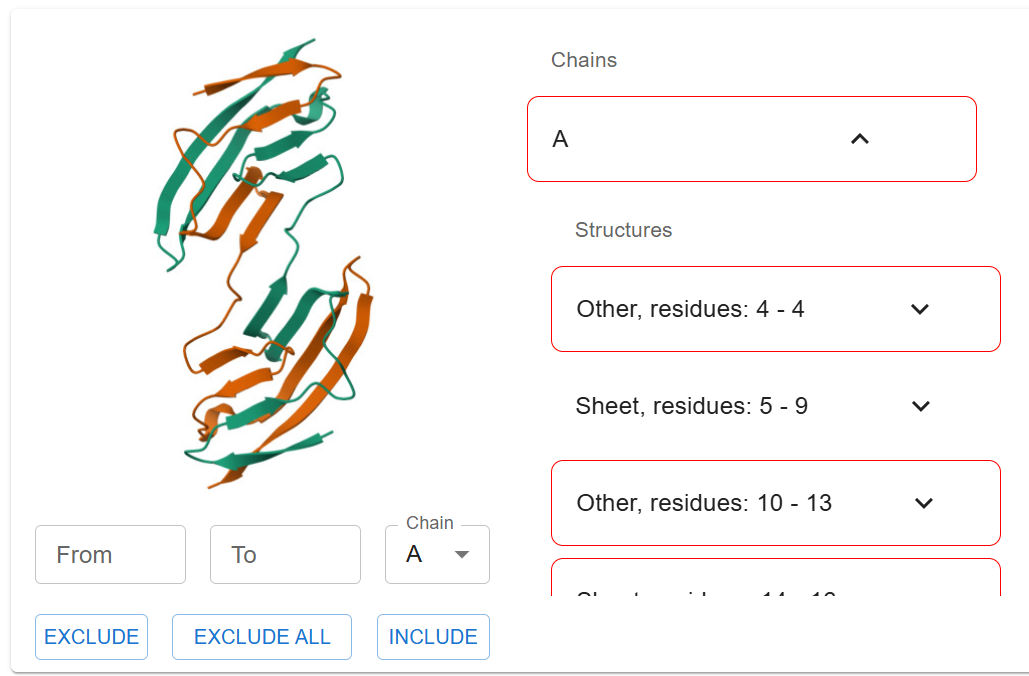


1. The results files appeare after clicking the option CALCULATE.

**In case of unsuccessful use please contact the Author :**

**Irena Roterman email:myroterm@cyf-kr.edu.pl**
